# Supplementary material for: Does human endometrial LGR5 gene expression suggest the existence of another hormonally regulated epithelial stem cell niche?
Source: PubMed Central journal article supplement (PMC5972618; doi:10.1093/humrep/dey083), 2018-04-10
Supplement: dey083suppl_figure1.pdf [file dey083suppl_figure1.pdf]

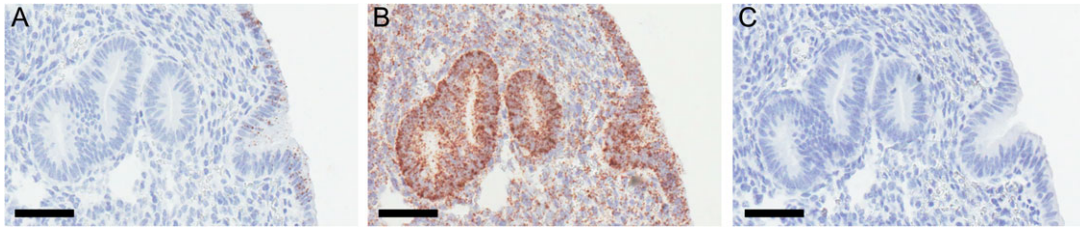

**Supplementary Figure S1** Representative *LGR5* ISH showing **A.** *LGR5* Probe **B.** Positive control **C.** Negative control, images of secretory endometrium (all images  $\times 400$ , scale bar = 60  $\mu\text{m}$ ).
