# Supplementary material for: Does human endometrial LGR5 gene expression suggest the existence of another hormonally regulated epithelial stem cell niche?
Source: PubMed Central journal article supplement (PMC5972618; doi:10.1093/humrep/dey083), 2018-04-10
Supplement: dey083suppl_figure2.pdf [file dey083suppl_figure2.pdf]

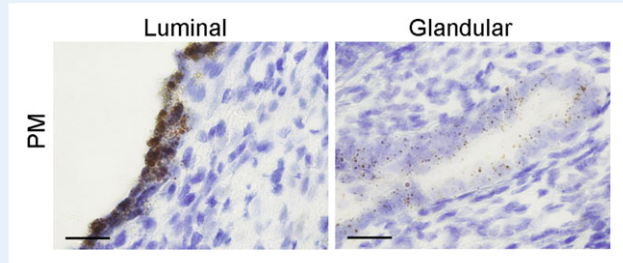

**Supplementary Figure S2** Representative *LGR5* ISH images of postmenopausal (PM) luminal and glandular epithelium of healthy human endometrium (all images  $\times 1000$ , scale bar = 20  $\mu\text{m}$ ).
