# Supplementary material for: Does human endometrial LGR5 gene expression suggest the existence of another hormonally regulated epithelial stem cell niche?
Source: PubMed Central journal article supplement (PMC5972618; doi:10.1093/humrep/dey083), 2018-04-10
Supplement: dey083suppl_figure3.pdf [file dey083suppl_figure3.pdf]

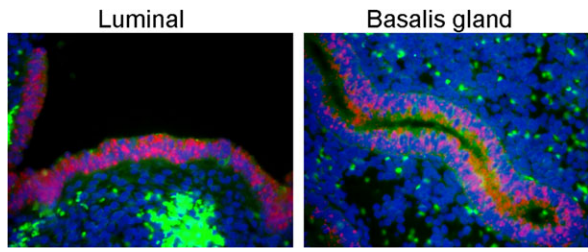

**Supplementary Figure S3** Representative co-localisation *LGR5* ISH probe (red)/anti-human SSEA-1 antibody immunofluorescence (green) images of luminal and basalis epithelium of healthy human full thickness endometrium (All images  $\times 400$ ).
