# Supplementary material for: Does human endometrial LGR5 gene expression suggest the existence of another hormonally regulated epithelial stem cell niche?
Source: PubMed Central journal article supplement (PMC5972618; doi:10.1093/humrep/dey083), 2018-04-10
Supplement: dey083suppl_figure5.pdf [file dey083suppl_figure5.pdf]

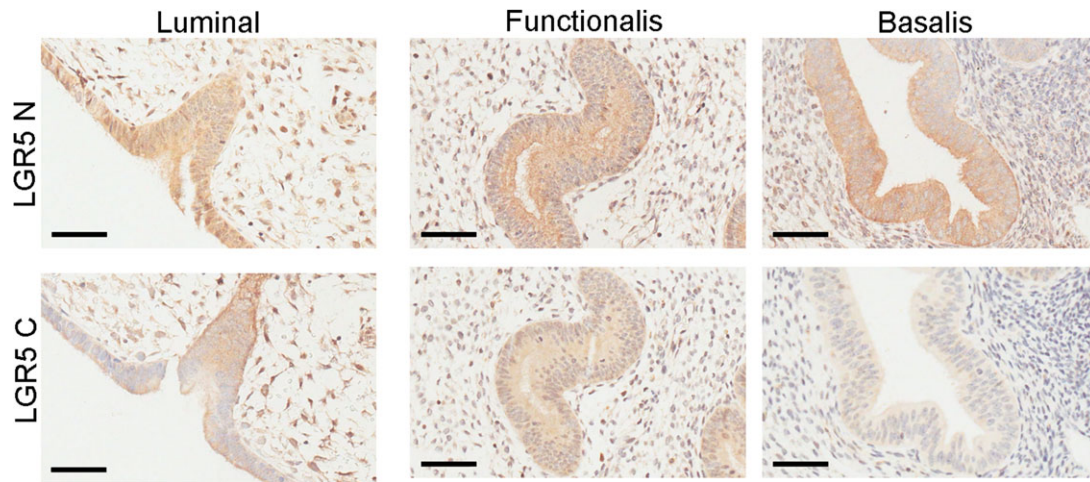

**Supplementary Figure S5** Representative images of staining pattern demonstrated with two commercially available IHC LGR5 antibodies, in luminal, stratum functionalis and stratum basalis of the human endometrium; LGR5 Antibody (centre) (LGR5 C) rabbit polyclonal (AP2745f) at 1:100 dilution and LGR5 Antibody (N-term) (LGR5 N) rabbit polyclonal (AP2745a) (all images  $\times 400$ , scale bar = 10  $\mu\text{m}$ ).
