# Supplementary material for: Does human endometrial LGR5 gene expression suggest the existence of another hormonally regulated epithelial stem cell niche?
Source: PubMed Central journal article supplement (PMC5972618; doi:10.1093/humrep/dey083), 2018-04-10
Supplement: dey083suppl_table1.pdf [file dey083suppl_table1.pdf]

**Supplementary Table S1 Demographics details of the patients included in the study.**

| Sample no. | Stage of cycle/treatment | Age (y) | BMI (kg/m <sup>2</sup> ) | Smoker | Parity |
|------------|--------------------------|---------|--------------------------|--------|--------|
| 1          | Proliferative            | 37      | 22.8                     | Yes    | 2      |
| 2          | Proliferative            | 31      | 43.9                     | No     | 1      |
| 3          | Proliferative            | 57      | 22                       | No     | 3      |
| 4          | Proliferative            | 42      | 25.6                     | Yes    | 2      |
| 5          | Proliferative            | 39      | 36.9                     | No     | 4      |
| 6          | Proliferative            | 50      | 21                       | No     | 4      |
| 7          | Proliferative            | 32      | 27.8                     | Yes    | 2      |
| 8          | Proliferative            | 45      | 36.4                     | No     | 3      |
| 9          | Proliferative            | 43      | 40.5                     | No     | 3      |
| 10         | Proliferative            | 48      | 37.3                     | No     | 2      |
| 11         | Proliferative            | 37      | 39.2                     | No     | 2      |
| 12         | Proliferative            | 44      | 29.6                     | No     | 1      |
| 13         | Proliferative            | 44      | 24.5                     | No     | 2      |
| 14         | Secretory                | 32      | 26.6                     | No     | 2      |
| 15         | Secretory                | 45      | 31.6                     | No     | 0      |
| 16         | Secretory                | 35      | 32                       | No     | 3      |
| 17         | Secretory                | 45      | 26.1                     | No     | 0      |
| 18         | Secretory                | 47      | 22.6                     | No     | 0      |
| 19         | Secretory                | 44      | 30.7                     | Yes    | 2      |
| 20         | Secretory                | 37      | 21.7                     | No     | 4      |
| 21         | Secretory                | 41      | 18.9                     | Yes    | 2      |
| 22         | Secretory                | 39      | 22.4                     | Yes    | 6      |
| 23         | Secretory                | 21      | 25.9                     | No     | 0      |
| 24         | Secretory                | 46      | 25.4                     | Yes    | 1      |
| 25         | Secretory                | 33      | 26.1                     | No     | 2      |
| 26         | Secretory                | 40      | 33                       | No     | 2      |
| 27         | POP                      | 36      | 23.9                     | No     | 4      |
| 28         | POP                      | 33      | 27.4                     | Yes    | 3      |
| 29         | POP                      | 25      | 20.9                     | No     | 0      |
| 30         | POP                      | 31      | 25.8                     | Yes    | 2      |
| 31         | POP                      | 37      | 25.7                     | No     | 0      |
| 32         | POP                      | 43      | 24.2                     | yes    | 2      |
| 33         | LNG-IUS                  | 46      | 26.2                     | No     | 3      |
| 34         | LNG-IUS                  | 45      | 22.5                     | No     | 2      |
| 35         | LNG-IUS                  | 35      | 24.4                     | No     | 1      |
| 36         | LNG-IUS                  | 33      | 32.7                     | Yes    | 3      |
| 37         | LNG-IUS                  | 33      | 25.9                     | No     | 5      |
| 38         | Explant                  | 26      | 33.4                     | Yes    | 2      |
| 39         | Explant                  | 44      | 30.7                     | Yes    | 2      |
| 40         | Explant                  | 27      | 33.7                     | No     | 2      |
| 41         | Explant                  | 40      | 33                       | No     | 2      |
| 42         | Explant                  | 43      | 25.4                     | No     | 2      |
| 43         | Explant                  | 47      | 24.2                     | Yes    | 0      |
| 44         | Explant                  | 48      | 28.6                     | No     | 2      |
| 45         | PM                       | 69      | 24.7                     | No     | 4      |
| 46         | PM                       | 69      | 26.8                     | No     | 3      |
| 47         | PM                       | 67      | 32.8                     | No     | 4      |

*Continued*

**Supplementary Table SI** *Continued*

| <b>Sample no.</b> | <b>Stage of cycle/treatment</b> | <b>Age (y)</b> | <b>BMI (kg/m<sup>2</sup>)</b> | <b>Smoker</b> | <b>Parity</b> |
|-------------------|---------------------------------|----------------|-------------------------------|---------------|---------------|
| 48                | PM                              | 66             | 24.9                          | No            | 3             |
| 49                | PM                              | 52             | 39.6                          | No            | 2             |
| 50                | PM                              | 74             | 35.6                          | No            | 3             |

POP, progesterone only pill; LNG-IUS, levonorgestrel-releasing intrauterine system; PM, postmenopausal.
