# Supplementary material for: Does human endometrial LGR5 gene expression suggest the existence of another hormonally regulated epithelial stem cell niche?
Source: PubMed Central journal article supplement (PMC5972618; doi:10.1093/humrep/dey083), 2018-04-10
Supplement: dey083suppl_table4.pdf [file dey083suppl_table4.pdf]

**Supplementary Table SIV Potential LGR5 regulating genes that are differentially expressed in the endometrial side population cells. The only published microarray study examining the sorted healthy normal endometrial epithelial side population cells that represent the primitive endometrial epithelial stem cell population, against the unsorted, therefore more differentiated epithelial cells (Cervello et al., 2010) (n = 8/group) was considered and included in the Nextbio-meta-analysis to identify the potential LGR5 regulating genes in the epithelial stem cells. Forty eight out of the 313 LGR5 regulating genes identified in the Supplementary table II were differentially expressed in the epithelial side population.**

**Biosets versus Genes record downloaded from Correlation Engine (2017/05/19 04:26:14)**

**Bioset 1: Endometrial epithelium – sorted side population cells \_vs\_ unsorted epithelial cells (Study: Side population cells of the human endometrial epithelium and stroma)**

<https://liverpool.ussc.informatics.illumina.com/c/search/adv.nb?ids=241789>

| Gene    | EntrezGene ID | Gene description                                                                 | Score    | P-value | Activity type | Activity value |
|---------|---------------|----------------------------------------------------------------------------------|----------|---------|---------------|----------------|
| CCL4    | 6351          | chemokine (C-C motif) ligand 4                                                   | 99.42137 | 0.0165  | Fold change   | 14.4           |
| NEUROG1 | 4762          | neurogenin 1                                                                     | 96.90486 | 0.0206  | Fold change   | -9.09          |
| SOX17   | 64321         | SRY (sex determining region Y)-box 17                                            | 85.69715 | 0.0437  | Fold change   | -4.46          |
| SOD2    | 6648          | superoxide dismutase 2, mitochondrial                                            | 77.15811 | 0.0063  | Fold change   | 3.68           |
| BCL6    | 604           | B-cell CLL/lymphoma 6                                                            | 76.38836 | 0.0097  | Fold change   | 3.63           |
| NR3C1   | 2908          | nuclear receptor subfamily 3, group C, member 1 (glucocorticoid receptor)        | 74.32844 | 0.0005  | Fold change   | 3.48           |
| BCR     | 613           | breakpoint cluster region                                                        | 72.14903 | 0.0392  | Fold change   | -3.38          |
| TBX3    | 6926          | T-box 3                                                                          | 70.3809  | 0.039   | Fold change   | 3.26           |
| GATA2   | 2624          | GATA binding protein 2                                                           | 70.23754 | 0.0003  | Fold change   | -3.25          |
| RUNX1   | 861           | runt-related transcription factor 1                                              | 65.49732 | 0.0295  | Fold change   | 3.06           |
| FOXA2   | 3170          | forkhead box A2                                                                  | 64.45625 | 0.0015  | Fold change   | -3.02          |
| KLF10   | 7071          | Kruppel-like factor 10                                                           | 62.58292 | 0.0043  | Fold change   | 2.95           |
| NFIL3   | 4783          | nuclear factor, interleukin 3 regulated                                          | 62.46955 | 0.0166  | Fold change   | 2.94           |
| CDX2    | 1045          | caudal type homeobox 2                                                           | 57.99993 | 0.0166  | Fold change   | -2.78          |
| ELK1    | 2002          | ELK1, member of ETS oncogene family                                              | 54.72974 | 0.0007  | Fold change   | -2.68          |
| PATZ1   | 23598         | POZ (BTB) and AT hook containing zinc finger 1                                   | 52.47856 | 0.0425  | Fold change   | -2.61          |
| POU5F1  | 5460          | POU class 5 homeobox 1                                                           | 51.38324 | 0.0209  | Fold change   | -2.57          |
| MYC     | 4609          | v-myc myelocytomatosis viral oncogene homologue (avian)                          | 47.85101 | 0.014   | Fold change   | 2.44           |
| TNFSF14 | 8740          | tumour necrosis factor (ligand) superfamily, member 14                           | 44.25523 | 0.0363  | Fold change   | 2.32           |
| RORA    | 6095          | RAR-related orphan receptor A                                                    | 40.17839 | 0.0104  | Fold change   | 2.19           |
| CABIN1  | 23523         | calcineurin binding protein 1                                                    | 39.78421 | 0.0449  | Fold change   | -2.17          |
| CACTIN  | 58509         | cactin, spliceosome C complex subunit                                            | 36.45856 | 0.0138  | Fold change   | -2.06          |
| HNF1B   | 6928          | HNF1 homeobox B                                                                  | 34.73115 | 0.0304  | Fold change   | -2             |
| TP53    | 7157          | tumour protein p53                                                               | 34.73115 | 0.0107  | Fold change   | -2             |
| MEIS2   | 4212          | Meis homeobox 2                                                                  | 33.6295  | 0.0219  | Fold change   | 1.96           |
| STAT3   | 6774          | signal transducer and activator of transcription 3 (acute-phase response factor) | 32.22958 | 0.0482  | Fold change   | -1.92          |
| IKZF2   | 22807         | IKAROS family zinc finger 2 (Helios)                                             | 29.0136  | 0.0436  | Fold change   | -1.8           |
| TCF7    | 6932          | transcription factor 7 (T-cell specific, HMG-box)                                | 28.50952 | 0.0391  | Fold change   | -1.78          |
| EMC10   | 284361        | ER membrane protein complex subunit 10                                           | 25.6162  | 0.0438  | Fold change   | -1.66          |
| PRMT5   | 10419         | protein arginine methyltransferase 5                                             | 25.41787 | 0.0348  | Fold change   | -1.65          |
| SETD8   | 387893        | SET domain containing (lysine methyltransferase) 8                               | 25.41787 | 0.0342  | Fold change   | -1.65          |
| GFI1    | 2672          | growth factor independent 1 transcription repressor                              | 24.67162 | 0.0108  | Fold change   | 1.62           |
| DLX2    | 1746          | distal-less homeobox 2                                                           | 24.26336 | 0.0361  | Fold change   | 1.6            |
| NFYA    | 4800          | nuclear transcription factor Y, alpha                                            | 23.97633 | 0.0276  | Fold change   | 1.59           |
| NFE2L2  | 4780          | nuclear factor (erythroid-derived 2)-like 2                                      | 23.97633 | 0.0154  | Fold change   | 1.59           |
| NFIC    | 4782          | nuclear factor I/C (CCAAT-binding transcription factor)                          | 23.25614 | 0.0293  | Fold change   | -1.55          |
| ESR1    | 2099          | oestrogen receptor 1                                                             | 23.07699 | 0.0318  | Fold change   | -1.54          |
| RXRA    | 6256          | retinoid x receptor, alpha                                                       | 22.53369 | 0.0055  | Fold change   | -1.51          |

Continued

**Supplementary Table SIV** *Continued***Biosets versus Genes record downloaded from Correlation Engine (2017/05/19 04:26:14)****Bioset 1: Endometrial epithelium – sorted side population cells\_vs\_ unsorted epithelial cells (Study: Side population cells of the human endometrial epithelium and stroma)**<https://liverpool.usc.informatics.illumina.com/c/search/adv.nb?ids=241789>

| Gene   | EntrezGene ID | Gene description                                         | Score    | P-value | Activity type | Activity value |
|--------|---------------|----------------------------------------------------------|----------|---------|---------------|----------------|
| STAT5A | 6776          | signal transducer and activator of transcription 5A      | 21.8965  | 0.004   | Fold change   | -1.47          |
| TBLIX  | 6907          | transducin (beta)-like 1X-linked                         | 21.58783 | 0.0227  | Fold change   | -1.45          |
| MITF   | 4286          | microphthalmia-associated transcription factor           | 20.95751 | 0.0437  | Fold change   | -1.4           |
| DNAJC2 | 27000         | Dnaj (Hsp40) homologue, subfamily C, member 2            | 20.58189 | 0.0187  | Fold change   | 1.37           |
| KLF11  | 8462          | Kruppel-like factor 11                                   | 20.58189 | 0.0002  | Fold change   | 1.37           |
| GTF2A1 | 2957          | general transcription factor IIA, 1, 19/37 kDa           | 20.38104 | 0.0186  | Fold change   | -1.35          |
| SGPL1  | 8879          | sphingosine-1-phosphate lyase 1                          | 20.27312 | 0.0496  | Fold change   | -1.34          |
| TBX5   | 6910          | T-box 5                                                  | 19.36176 | 0.0137  | Fold change   | 1.22           |
| POU3F1 | 5453          | POU class 3 homeobox 1                                   | 19.36176 | 0.0301  | Fold change   | 1.22           |
| ATP2B2 | 491           | ATPase, Ca <sup>++</sup> transporting, plasma membrane 2 | 19.31292 | 0.0261  | Fold change   | -1.21          |
